# Supplementary material for: Photochemical activation of MH3-B1/rGel: a HER2-targeted treatment approach for ovarian cancer
Source: PubMed Central journal article supplement (PMC4494949; doi:10.18632/oncotarget.3814), 2015-04-14
Supplement: oncotarget-06-12436-s001.pdf [file oncotarget-06-12436-s001.pdf]

# Photochemical activation of MH3-B1/rGel; a HER2-targeted treatment approach for ovarian cancer

## Supplementary Material

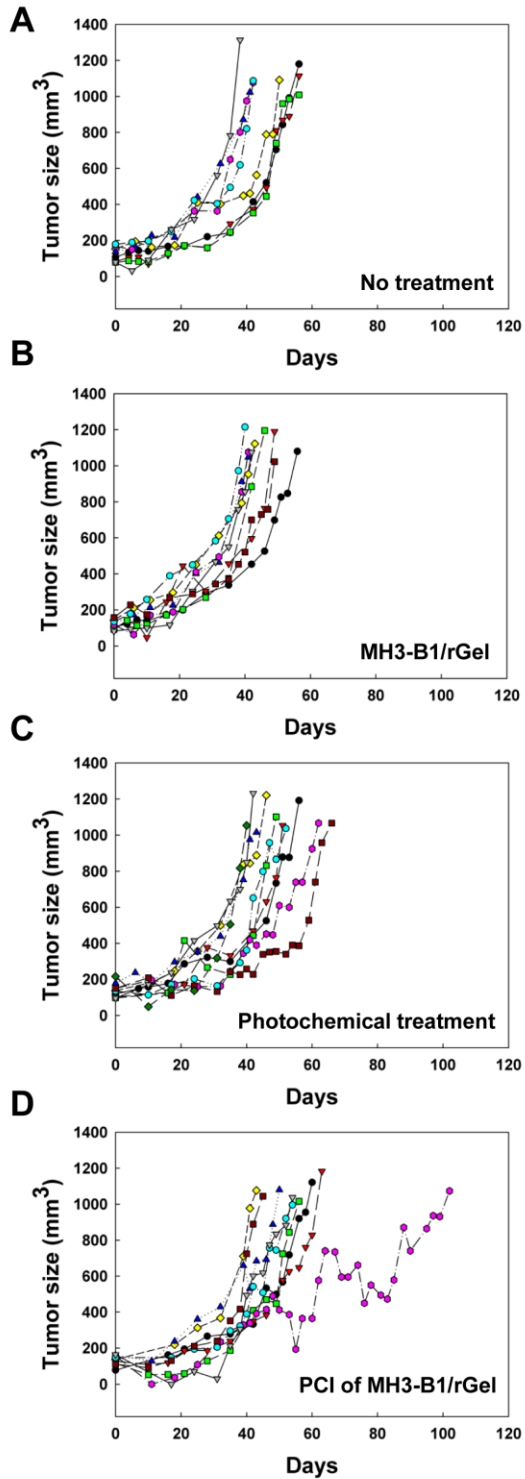

**Fig. S1.** Growth curves of SKOV-3 xenografts in the four treatment groups; no treatment (A), MH3-B1/rGel (B), photochemical treatment (C) and PCI of MH3-B1/rGel (D).
